# Supplementary material for: Aqueous phase/nanoparticles interface: hydroxypropyl cellulose adsorption and desorption triggered by temperature and inorganic salts
Source: Royal Society of Chemistry journal article supplement (doi:10.1039/c2sm07021a), 2012-01-01
Supplement: c2sm07021a.pdf [file c2sm07021a.pdf]

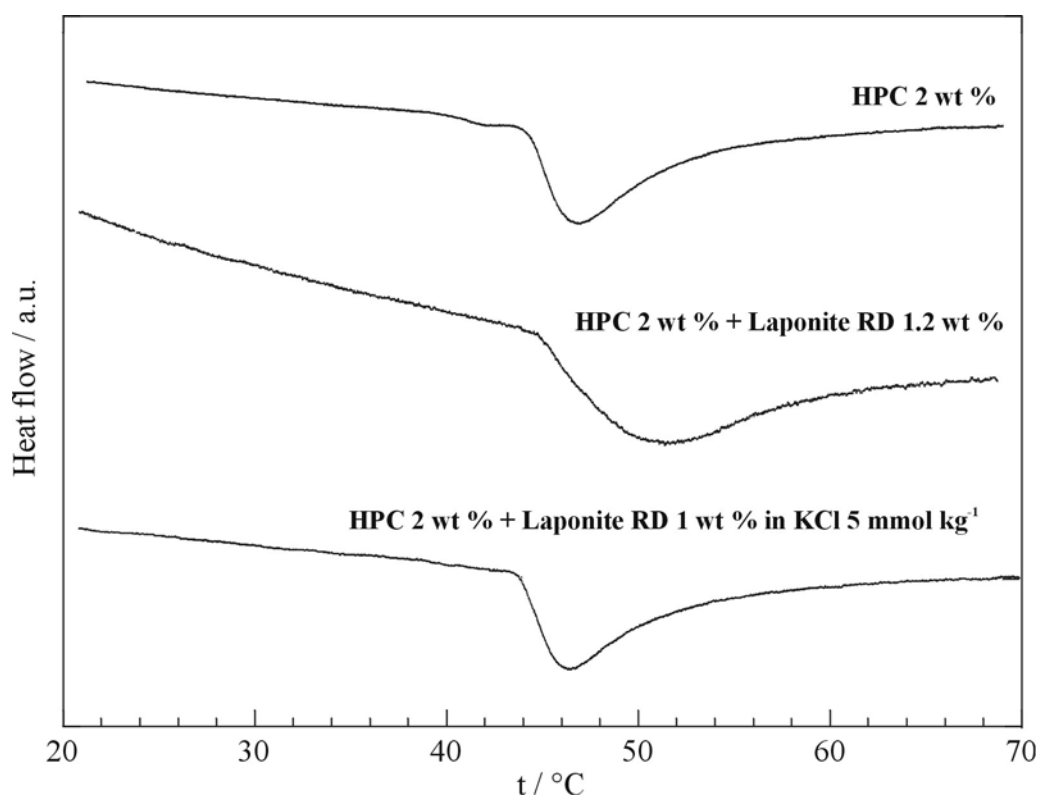

**Figure 1s.** Thermograms for aqueous HPC solutions in different aqueous media.

**Table 1s.** Cloud point temperature for HPC based solution as a function of time.

| Sample                                                         | Time from preparation / minutes | $t_c / ^\circ\text{C}$ |
|----------------------------------------------------------------|---------------------------------|------------------------|
| HPC 2 wt %                                                     | 60                              | 46.8                   |
|                                                                | 288                             | 46.9                   |
|                                                                | 516                             | 46.7                   |
| HPC 2 wt % + Laponite RD 0.9 wt %                              | 60                              | 48.6                   |
|                                                                | 288                             | 48.4                   |
|                                                                | 516                             | 48.3                   |
| HPC 2 wt % + Laponite RD 1 wt % in KCl 5 mmol kg <sup>-1</sup> | 60                              | 46.5                   |
|                                                                | 288                             | 46.6                   |
|                                                                | 516                             | 46.6                   |

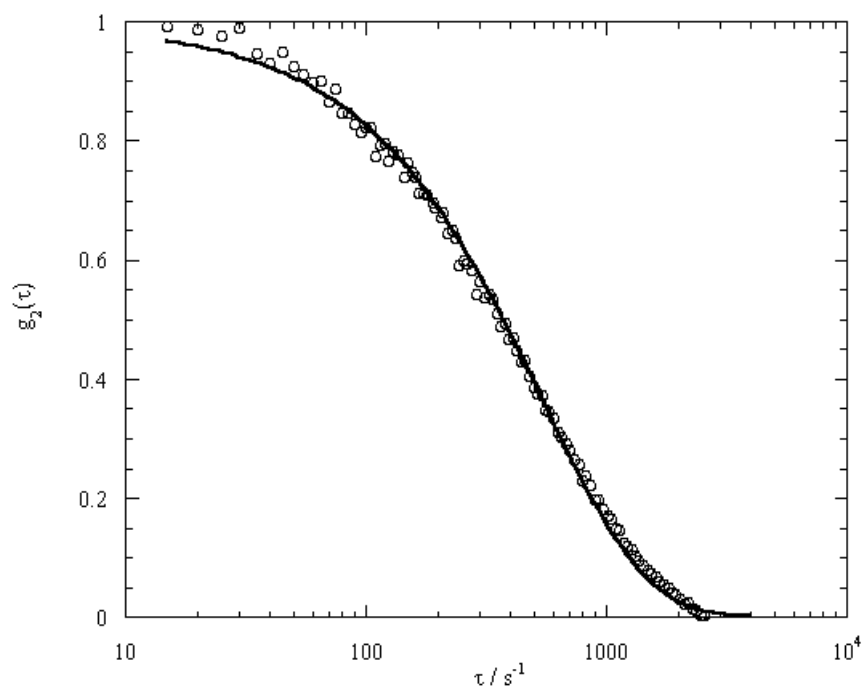

**Figure 2s.** Intensity-time correlation functions of HPC 0.125 wt% + Laponite RD 0.025 wt%. Line is best fit according to the mono-exponential decay.
